# Supplementary material for: Error apportionment for atmospheric chemistry-transport models – a new approach to model evaluation
Source: Copernicus journal article supplement (doi:10.5194/acp-16-6263-2016), 2016-05-24
Supplement: Supplementary file 1 [file acp-16-6263-2016-supplement.pdf]

Supplement of Atmos. Chem. Phys., 16, 6263–6283, 2016  
<http://www.atmos-chem-phys.net/16/6263/2016/>  
doi:10.5194/acp-16-6263-2016-supplement  
© Author(s) 2016. CC Attribution 3.0 License.

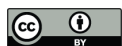

Atmospheric  
Chemistry  
and Physics  
Open Access  
EGU

*Supplement of*

## **Error apportionment for atmospheric chemistry-transport models – a new approach to model evaluation**

**Ef시오 Solazzo and Stefano Galmarini**

*Correspondence to:* Stefano Galmarini (stefano.galmarini@jrc.ec.europa.eu)

The copyright of individual parts of the supplement might differ from the CC-BY 3.0 licence.

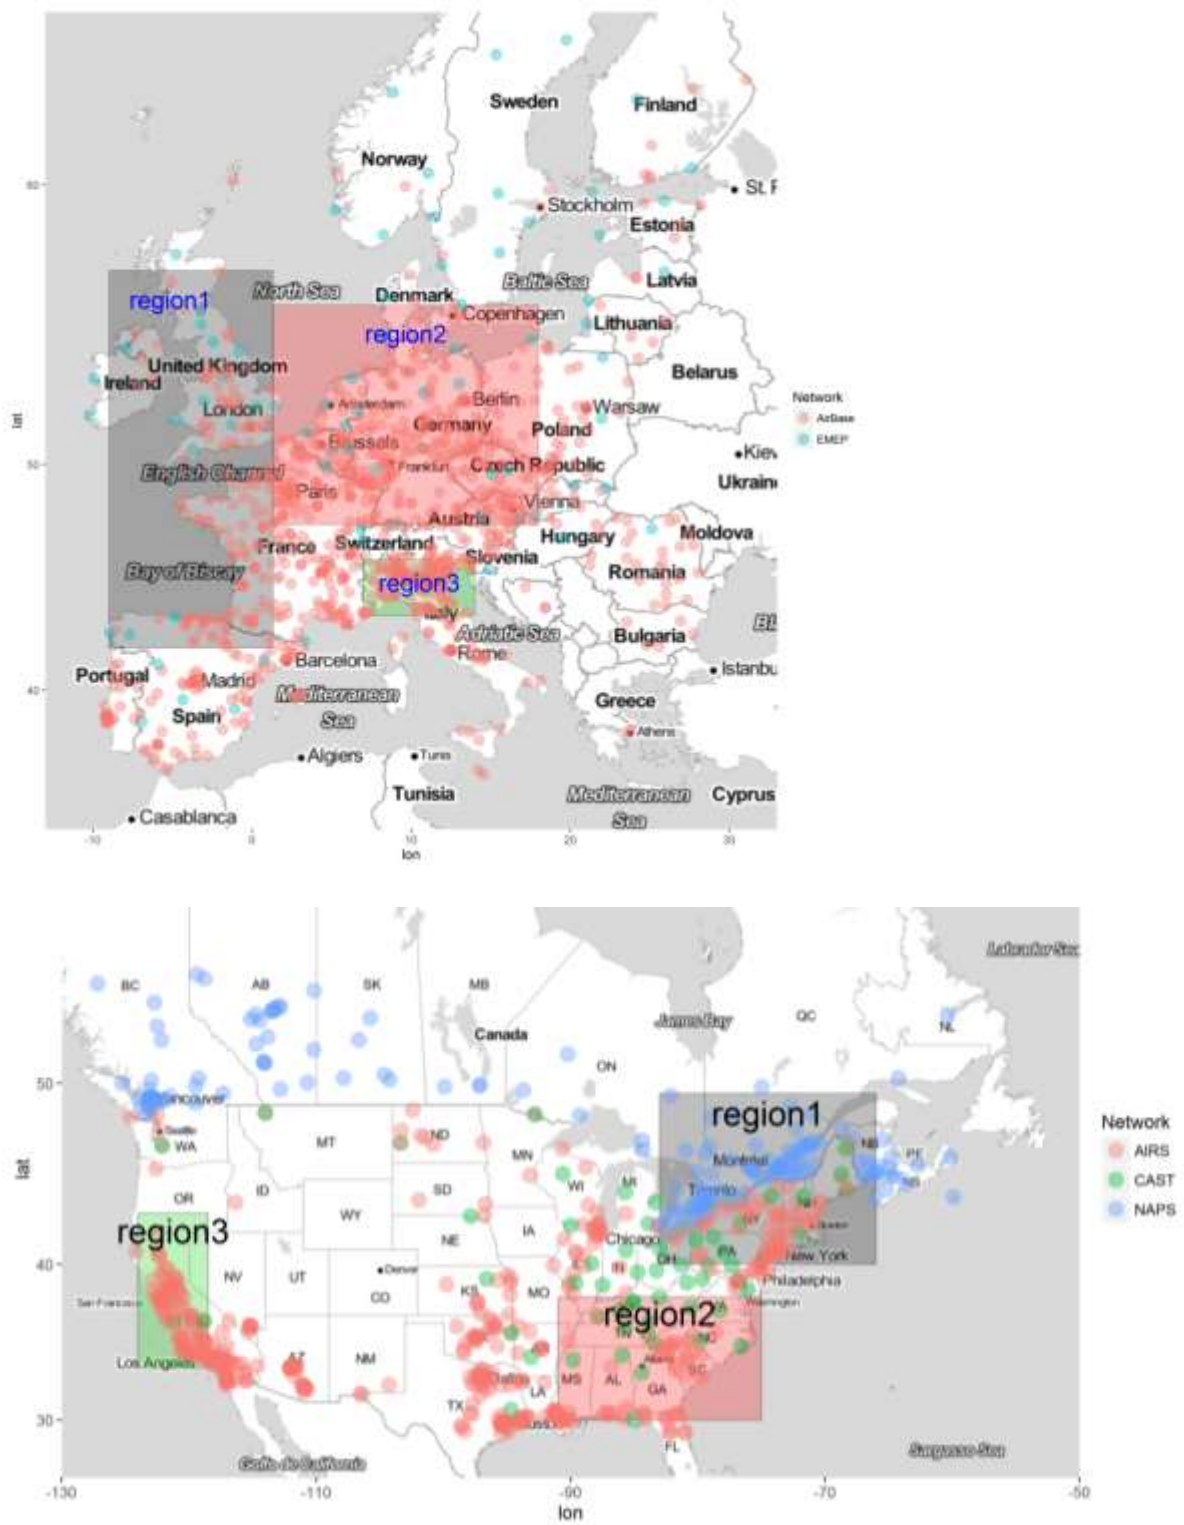

**FIGURE S1.** Sub-regions of the two continental domains a) EU, and b) NA. Overlaid are the ozone monitoring stations for the year 2010 classified based on the network.

## AQMEI1 - EUROPE

MSE of the spectral components - ozone - May-September - EU - region1

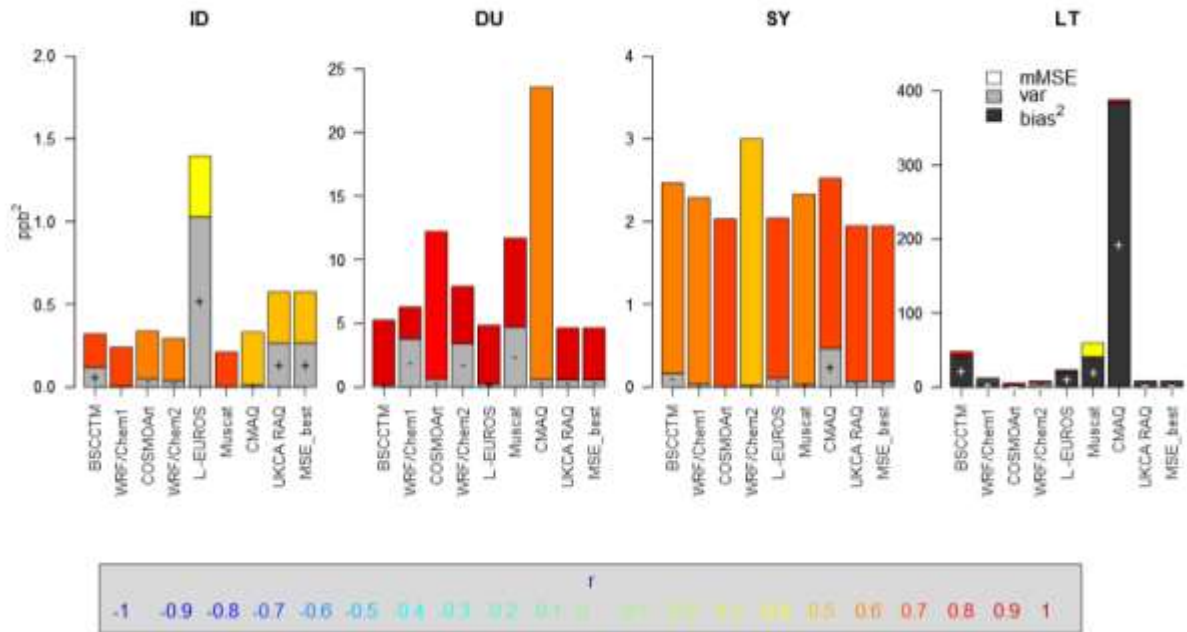

MSE of the spectral components - ozone - May-September - EU - region2

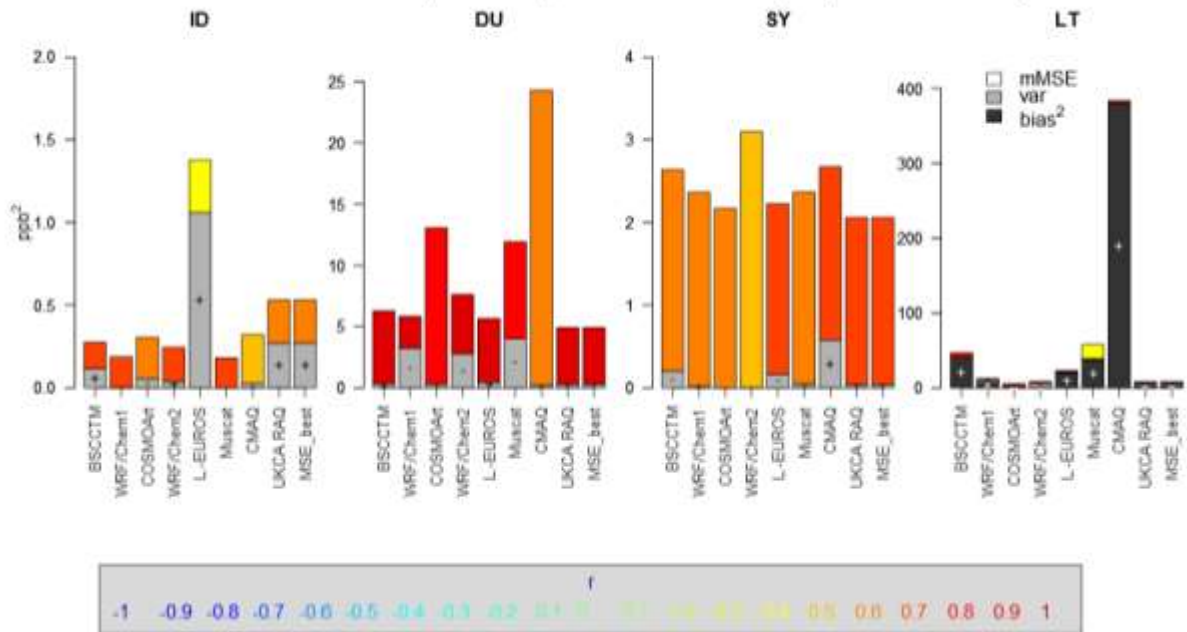

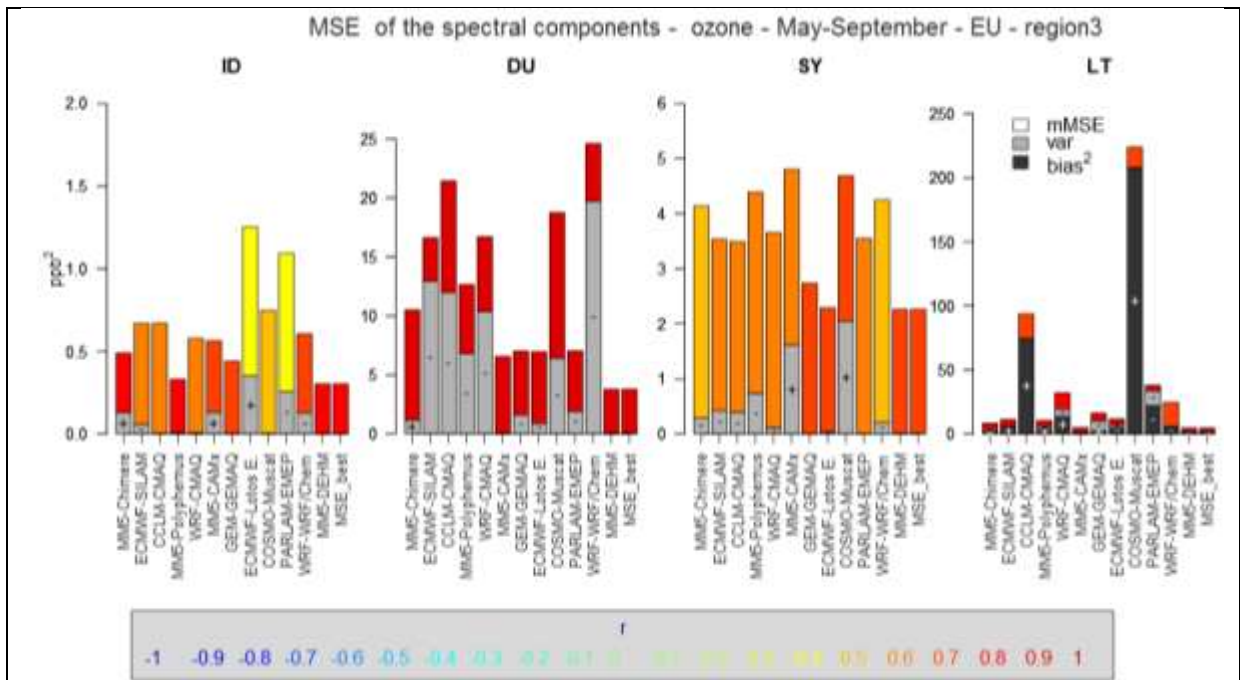

### AQMEI1 - North America

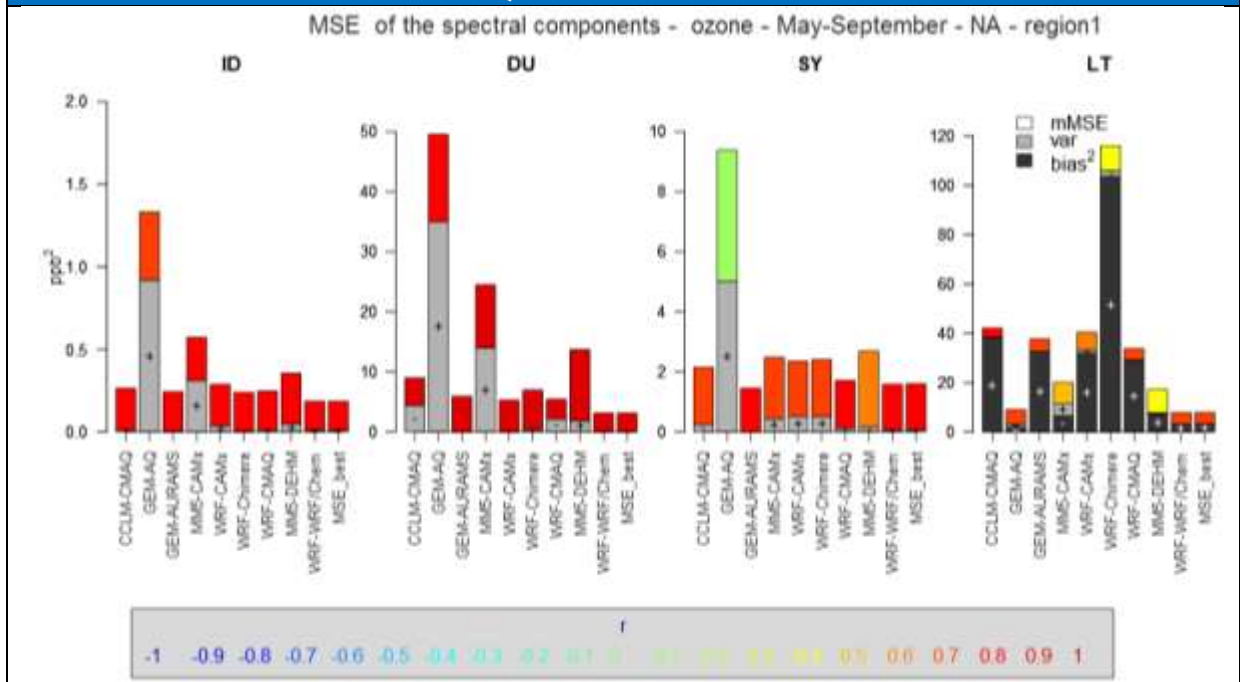

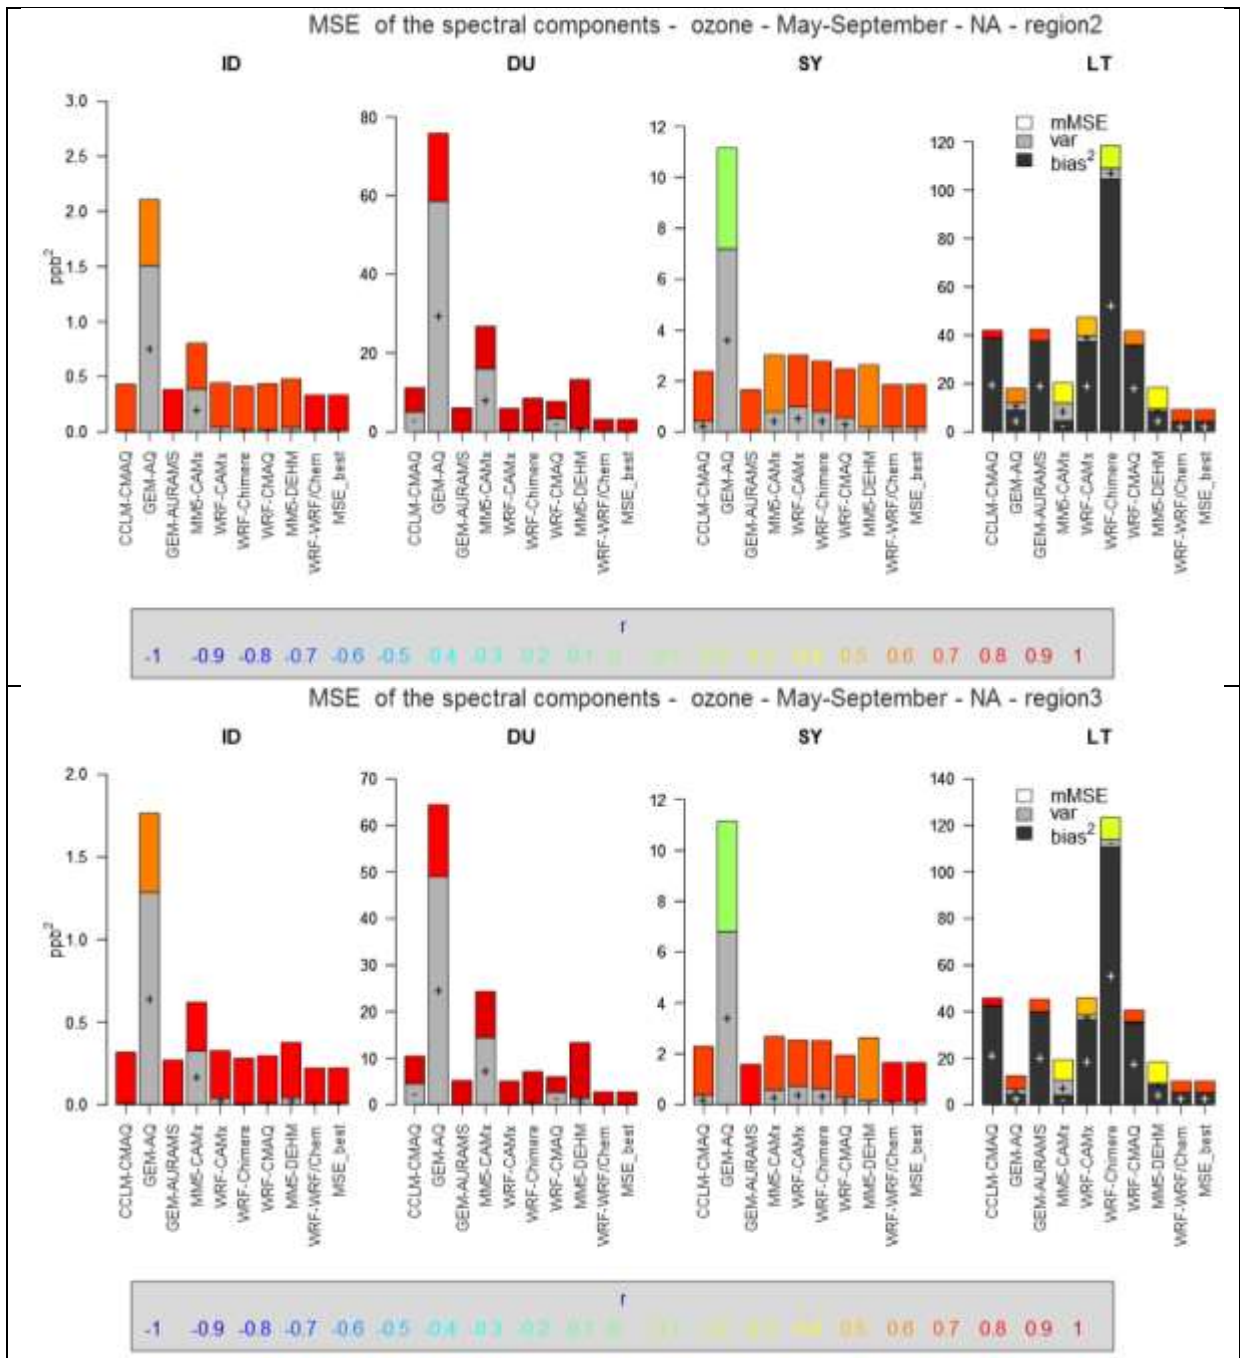

**FIGURE S2.** MSE (ppb<sup>2</sup>) breakdown in bias, variance and mMSE of the spectral components ID, DU, SY, LT (based on Eq 9) for the models of AQMEI1 and the three sub-regions of **FIGURE S1**. The sign within the share of bias and variance indicates model overestimation (+) or underestimation (-) of mean concentration (bias) and variance. The colour of the *mMSE* share of the error is coded based on the values of *r*, the correlation coefficient, according to the colour scale at the bottom of each plot. Top three panels: EU; lower three panels: NA.



## AQMEI 2 - EUROPE

MSE of the spectral components - ozone - May-September - EU - region1

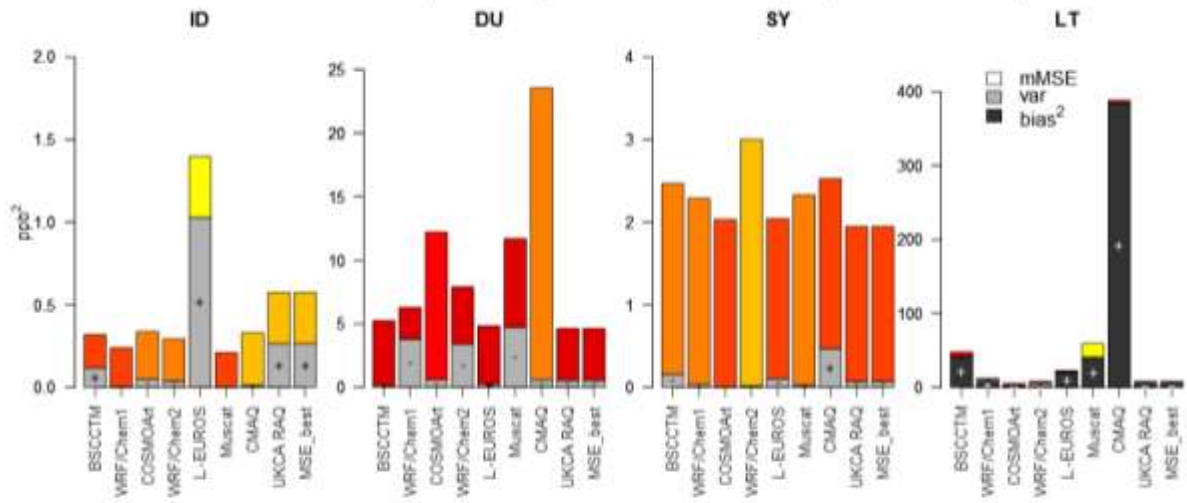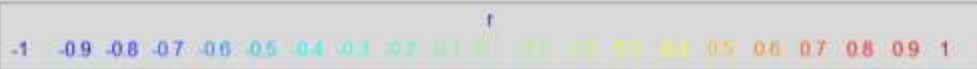

MSE of the spectral components - ozone - May-September - EU - region2

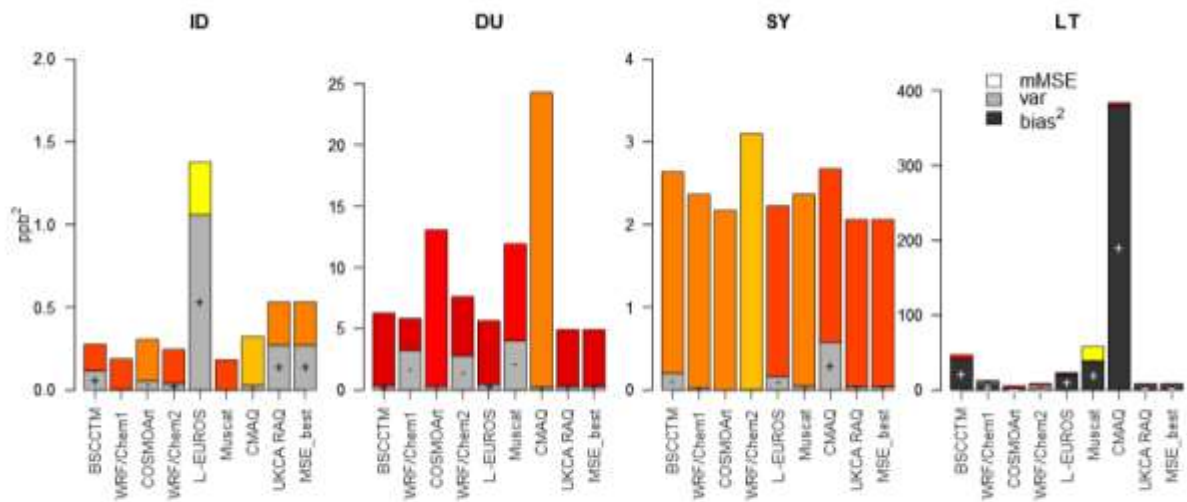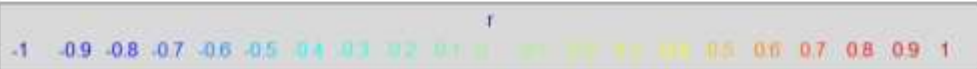

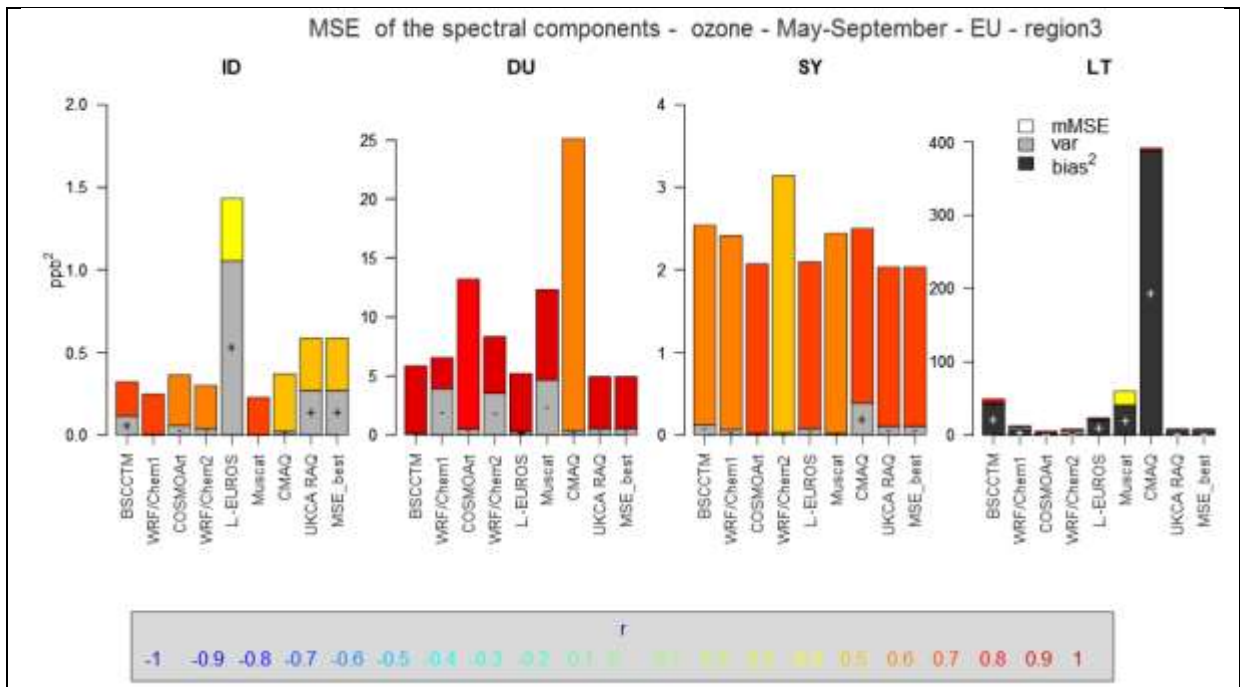

**AQMEII 2 – North America**

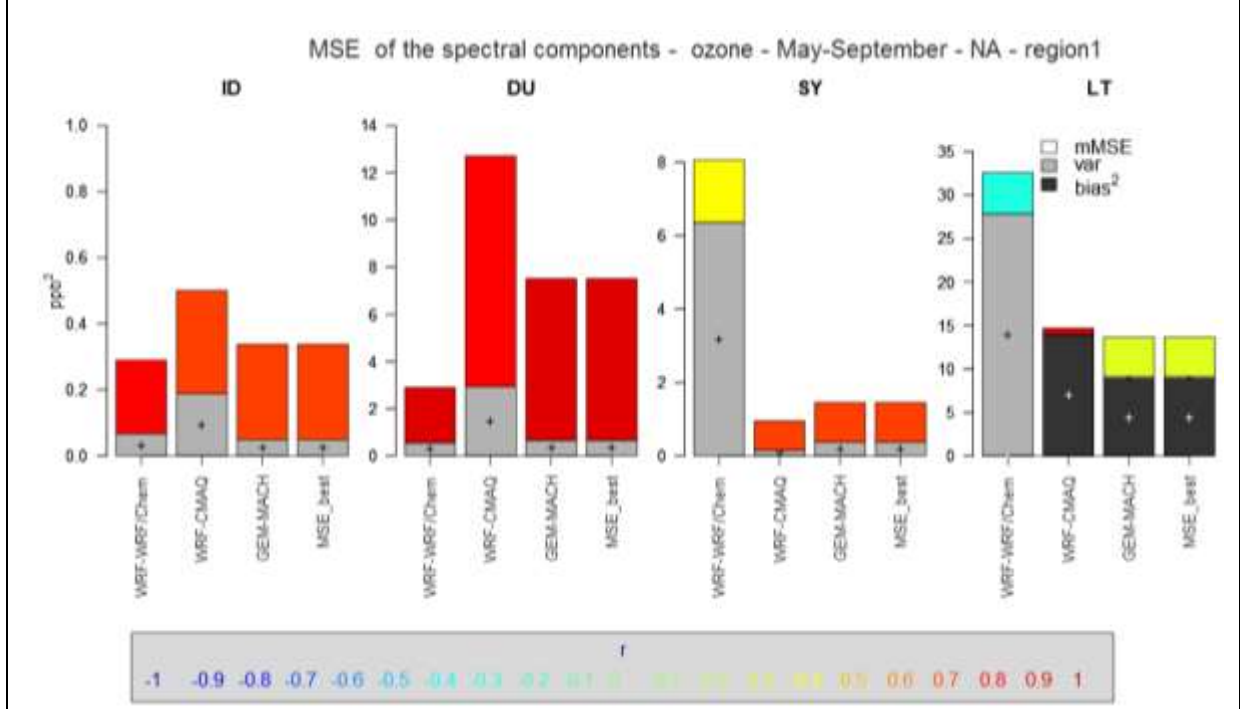

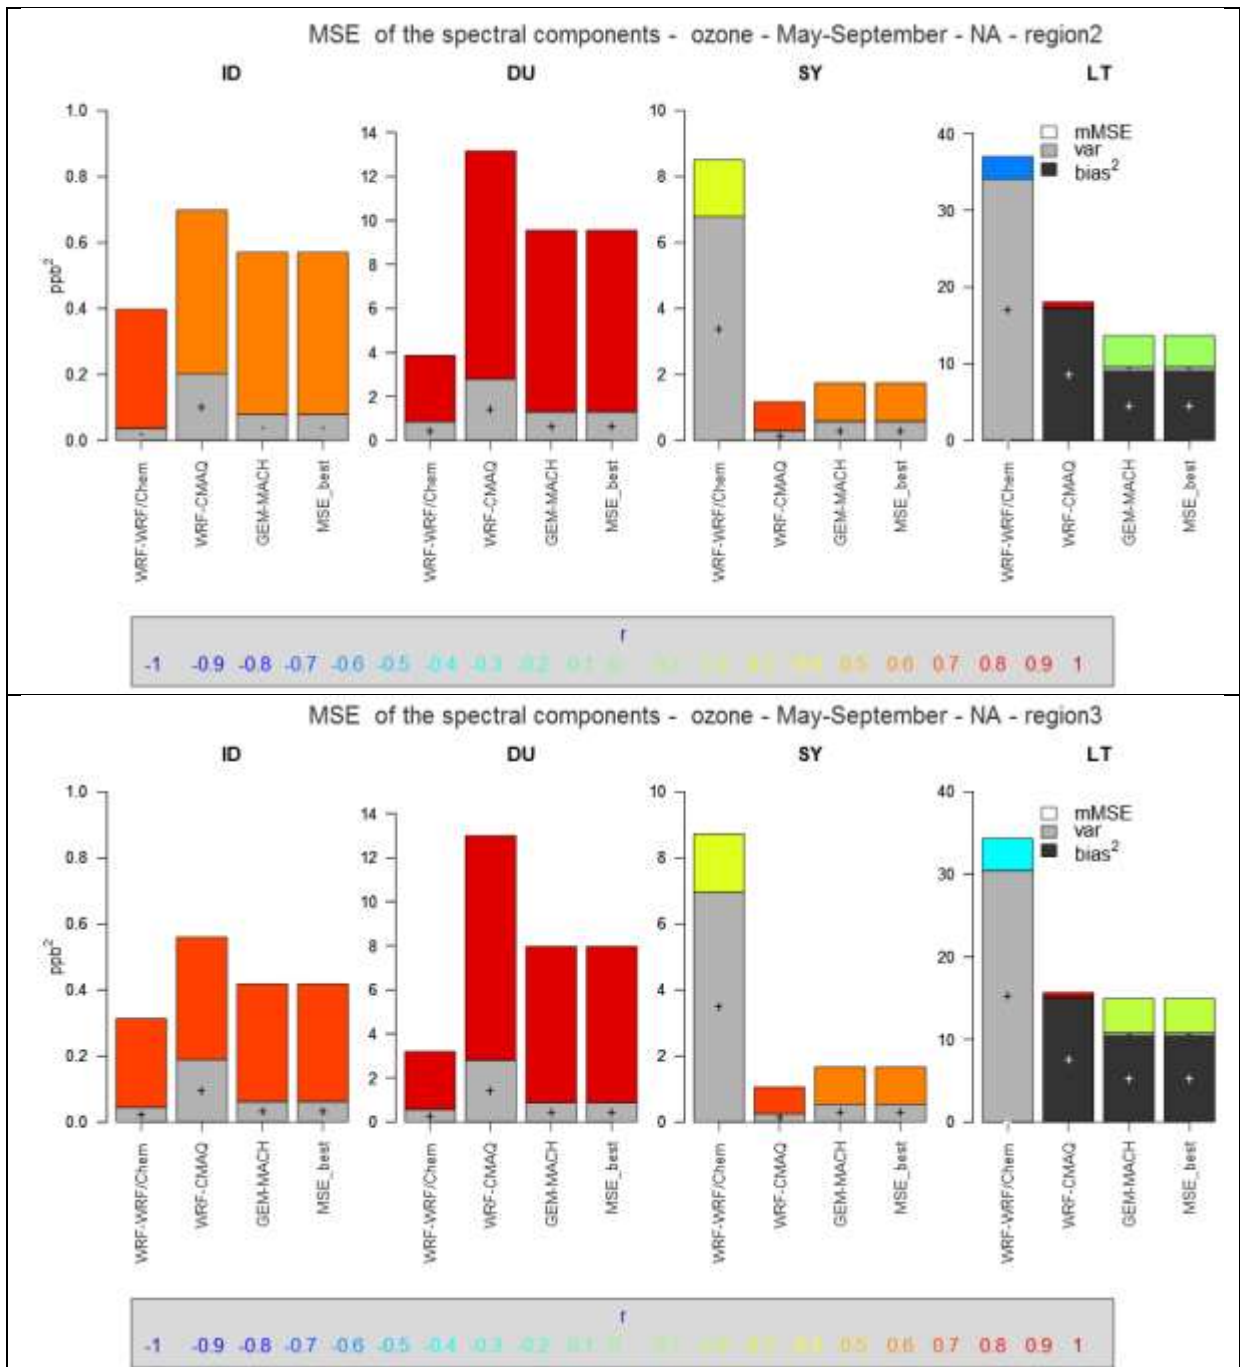

FIGURE S 3. As in

Figure S2 for the models of AQMEII2.
